# Supplementary material for: SOX9 is a major negative regulator of cartilage vascularization, bone marrow formation and endochondral ossification
Source: Oxford University Press journal article supplement (doi:10.1242/dev.045203), 2010-02-23
Supplement: dev045203tables1.pdf [file dev045203tables1.pdf]

**Table S1. Oligonucleotide primers**

| Name                                 | Sequence                                        | Purpose                                           |
|--------------------------------------|-------------------------------------------------|---------------------------------------------------|
| <i>P1</i> ( <i>Col10a1</i> Intron ); | 5'-TTTAGAGCATTATTTCAAGGCAGTTTCCA-3'             | PCR1: <i>BAC-Col10a1-Sox9</i> Tg genotyping       |
| <i>P2</i> ( <i>Sox9</i> Rev)         | 5'-ATGCACACGGGGAACCTTATC-3'                     |                                                   |
| <i>mCol10-5'</i>                     | 5'-TGCTGCCCTGGTCTTACTCT-3'                      | <i>BAC-Col10a1-Sox9</i> transgene copy number PCR |
| <i>mCol10-3'</i>                     | 5'-GCCTTGGGATCCTAAACCTC-3'                      |                                                   |
| Chondromodulin (mouse, 677 bp)       | 5'-GGGGCATTCTGTTGTAGGG-3'                       | Riboprobe for ISH                                 |
| <i>Col10a1</i>                       | 5'-CAATTGCTTCTTTTGTCCGC-3'                      |                                                   |
| <i>Sox9</i>                          | 5'-TGCTGCCTCAAATACCTTTCT-3'                     | Real-time PCR                                     |
|                                      | 5'-TGCGGTATGGGATGAAGTATTG-3'                    |                                                   |
| <i>Sox9</i>                          | 5'-ACGGCTCCAGCAAGAACAAG-3'                      | Real-time PCR                                     |
|                                      | 5'-TTGTGCAGATGCGGGTACTG-3'                      |                                                   |
| <i>Ihh</i>                           | 5'-CCACTTCCGGGGCACATTTG-3'                      | Real-time PCR                                     |
|                                      | 5'-GGCCACCACATCCTCCACCA-3'                      |                                                   |
| <i>Vegfa</i>                         | 5'-CCTGGTAATGGCCCTCCTC-3'                       | Real-time PCR                                     |
|                                      | 5'-CCCCATTGCTCTGTGCCTTG-3'                      |                                                   |
| <i>Runx2</i>                         | 5'-AGAAGAGCCAGGCAGGTGCTT-3'                     | Real-time PCR                                     |
|                                      | 5'-TTCGTGGGTTGGAGAACGC-3'                       |                                                   |
| <i>Mmp9</i>                          | 5'-GGAACTCACACGACATCTTCCA-3'                    | Real-time PCR                                     |
|                                      | 5'-GAAACTCACAGCCAGAAGAATT-3'                    |                                                   |
| <i>Mmp13</i>                         | 5'-TCCTCGGAGACTGGTAATGG-3'                      | Real-time PCR                                     |
|                                      | 5'-TGATGAAACCTGGACAAGCA-3'                      |                                                   |
| cyclophilin A                        | 5'-CCACCGTGTCTTCGACAT-3'                        | Real-time PCR                                     |
| <i>GAPDH</i>                         | 5'-CAGTGCTCAGAGCTCGAAAAG-3'                     | Real-time PCR                                     |
|                                      | 5'-CAATGACCCCTTCATTGACC-3'                      |                                                   |
| <i>VEGFA</i> 1/379                   | 5'-GACAAGCTTCCCCTTCTCAG-3'                      | Reporter gene fragment                            |
|                                      | 5'-CGCCGGATCctctctctgaccctctctctctctc-3'        |                                                   |
| <i>VEGFA</i> 1/230                   | 5'-GGAAAGATCTtcgcgaggccttggggcagccgggtag-3'     | Reporter gene fragment                            |
|                                      | 5'-CGCCGGATCcaagcaaaaataataaaacgagaaacaatcag-3' |                                                   |
| <i>VEGFA</i> 1/230 mutant            | 5'-GGAAAGATCTtcgcgaggccttggggcagccgggtag-3'     | Reporter gene fragment                            |
|                                      | 5'-CGCCGGATCgcggaataataataaaacgagagcgggtacag-3' |                                                   |
| <i>Vegf</i> pro-2SRY                 | 5'-GGAAAGATCTtcgcgaggccttggggcagccgggtag-3'     | SRY oligonucleotide for Emsa                      |
|                                      | 5'-ggTGTATTGTTTCTCGTTTTAATTTATTTTTCGCTT-3'      |                                                   |
| <i>Vegf</i> pro-2SRY mutant          | 5'-ggAAGCAAAAATAAATTA AAAACGAGAAAAAACAATACA-3'  | Mutant SRY oligonucleotide for Emsa               |
|                                      | 5'-ggTGTACCGCTCTCGTTTTAATTTATTTCCGCC-3'         |                                                   |
| <i>Sox9</i> sense, antisense         | 5'-ggGGGCGGAAAATAAATTA AAAACGAGAGCGGTACA-3'     | <i>Sox9</i> siRNA                                 |
|                                      | 5'-UGACGUCGAAGGUCUCAUUGUUGGAtt-3'               |                                                   |
| <i>Vegf</i> SRY 1/230                | 5'-UCCAACAUUGAGACCUUCGACGUCAtt-3'               | ChIP                                              |
|                                      | 5'-CCCCGGAGTCTGTGCTCTGGGATTGAT-3'               |                                                   |
| β-actin                              | 5'-CTTCTCTCTGGAGCTCTTGATACCTCTT-3'              | ChIP                                              |
|                                      | 5'-GATGACCTGGCCGTGAGGCAGCTCATA-3'               |                                                   |
|                                      | 5'-ACGTAGCCATCCAGGCTGTGCTGTCCC-3'               |                                                   |
