# Supplementary material for: SOX9 is a major negative regulator of cartilage vascularization, bone marrow formation and endochondral ossification
Source: Oxford University Press journal article supplement (doi:10.1242/dev.045203), 2010-02-23
Supplement: dev045203tables2.pdf [file dev045203tables2.pdf]

**Table S2. BAC-Col10a1-Sox9 copy number of five transgenic founders lines**

| Founder # | Born     | Sex | Transgene copy # |
|-----------|----------|-----|------------------|
| 4688      | 24.07.07 | m   | 1                |
| 4724      | 24.07.07 | m   | 1                |
| 4678      | 24.07.07 | f   | 2                |
| 4779      | 21.08.07 | m   | 4                |
| 4780      | 21.08.07 | f   | 2                |

Lines were analyzed by real-time PCR quantitation of *Col10a1* gene copies. Values were standardized for two *Col10a1* alleles in wild-type animals. Only founder #4779, containing 4 BAC copies, was not fertile and could not be further analyzed.
