# Supplementary figures and images for: SOX9 is a major negative regulator of cartilage vascularization, bone marrow formation and endochondral ossification
Source: Oxford University Press journal article supplement (doi:10.1242/dev.045203), 2010-02-23

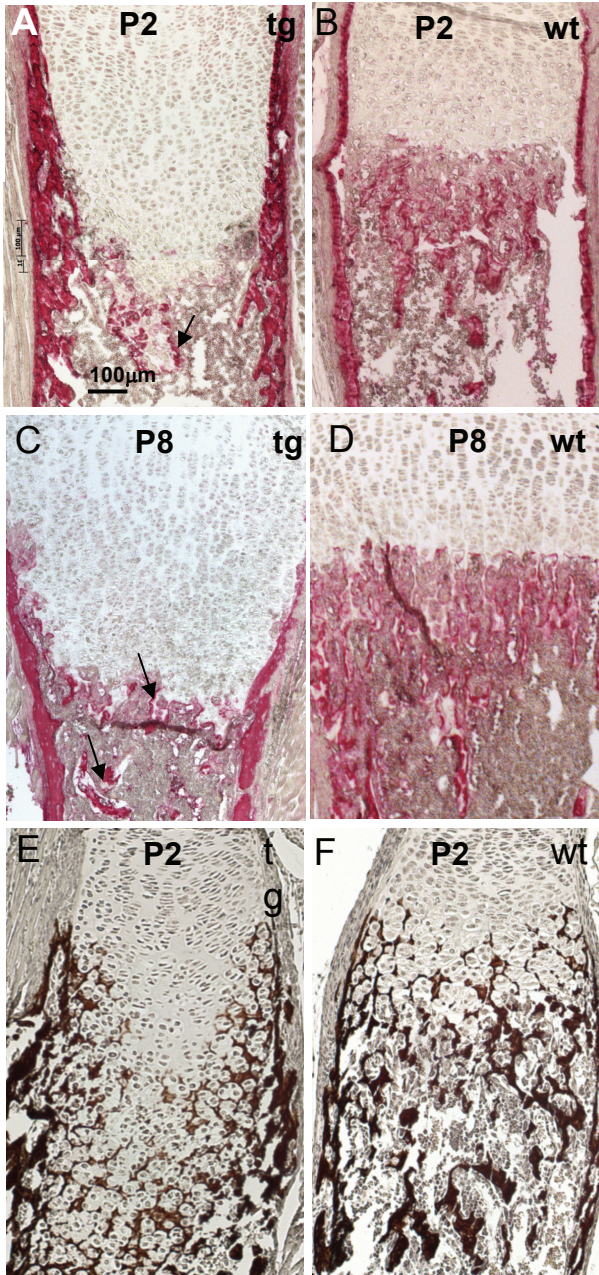

Supplement: dev045203-sup-045203figs1.pdf [file dev045203-sup-045203figs1.pdf]

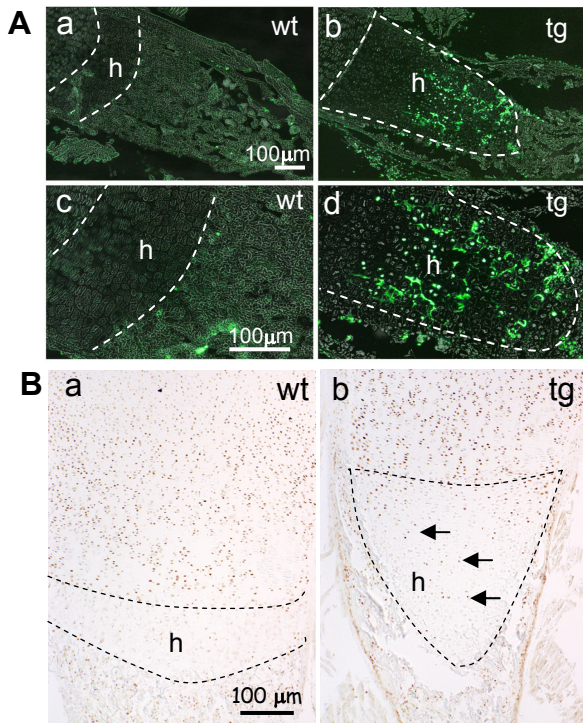

Supplement: dev045203-sup-045203figs2.pdf [file dev045203-sup-045203figs2.pdf]

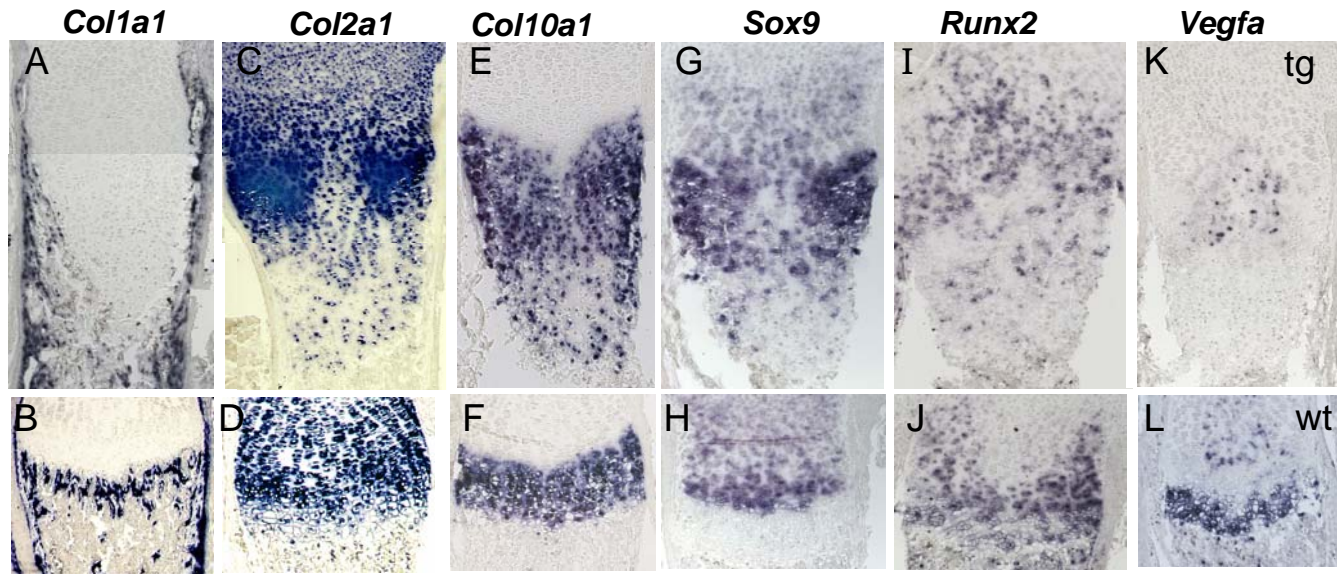

Supplement: dev045203-sup-045203figs3.pdf [file dev045203-sup-045203figs3.pdf]

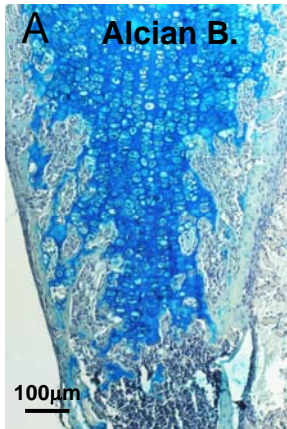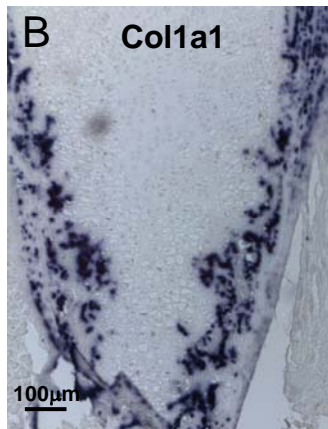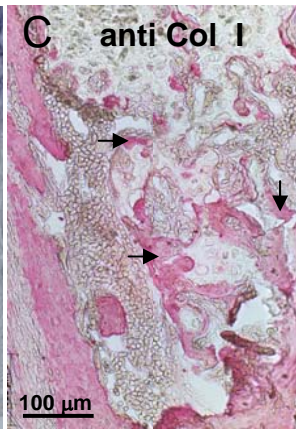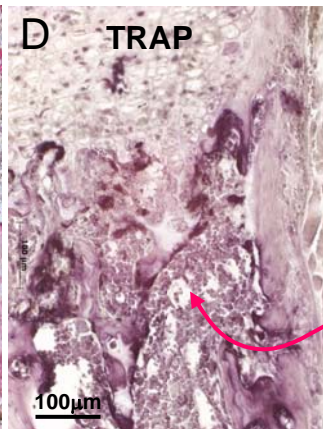

Supplement: dev045203-sup-045203figs4.pdf [file dev045203-sup-045203figs4.pdf]

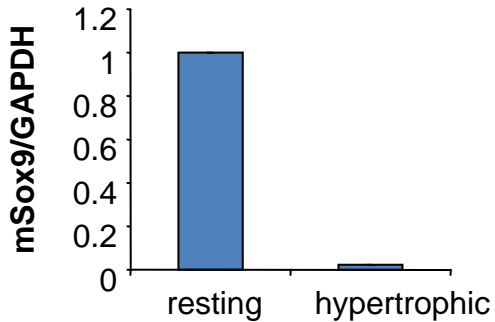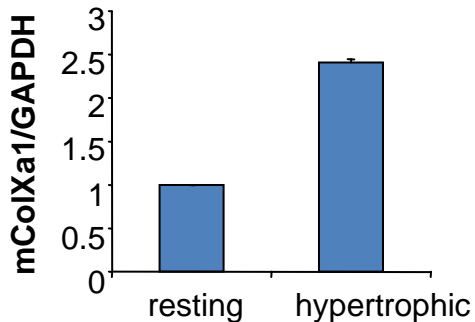

Supplement: dev045203-sup-045203figs5.pdf [file dev045203-sup-045203figs5.pdf]
